# Supplementary material for: Drug shortages in a state-owned academic hospital during the COVID-19 pandemic in Ecuador
Source: Research Square preprint supplement (doi:10.21203/rs.3.rs-289532/v1), 2021-03-02
Supplement: Supplementary file 1 [file 42718351314c5fac936fa64f.xlsx]

## Sheet: table_2_final
	Table 2. Changes in unit purchase price of a group of medicines most used in critical care unit before and during COVID-19 pandemic in Ecuador.
	Main purchase mechanism during COVID-19 pandemic shortage	ATC code and medicine formulation	Unit purchase price during year 2019 (USD)	Unit purchase price during COVID-19 pandemic (USD)	Price change (%)
	Retail	C03CA01 Furosemide 10 mg/mL parenteral solution	0.0488	0.0488	--
		C01CA03 Norepinephrine 1 mg/mL parenteral solution	0.74	6.8	8.18919
		H02AB02 Dexamethasone 4 mg/mL parenteral solution	0.04999	0.28	4.60112
		B01AB05 Enoxaparin 60 mg parenteral solution	1.88	6.8	2.61702
		B01AB05 Enoxaparin 40 mg parenteral solution	1.68	3.48	1.07143
		B01AB01 Nonfractionated heparin 5000 UI/mL parenteral solution	3	3.5	0.166667
		R03BB01 Ipratropium bromide 0.02 mg inhalation solution	10.35	9.12	-0.118841
	Emergency direct purchase	N05AD01 Haloperidol 5 mg/mL parenteral solution	0.17	0.17	--
		N05CD08 Midazolam 5 mg/mL parenteral solution	0.83	0.83	--
		J01FA10 Azithromycin 500 mg oral solid	0.188	0.78	3.14894
		M03AC09 Rocuronium bromide 100 mg/mL parenteral solution	2.26889	4.7	1.0715
		H02AB04 Methylprednisolone 125 mg parenteral solid	6.2	7.8	0.258065
		N02AB03 Fentanyl 0.05 mg/mL parenteral solution	1.35	1.5	0.111111
		N02BE01 Paracetamol 10 mg/mL parenteral solution	1.0833	1.2	0.107724
		C01CA24 Epinephrine 1 mg/mL parenteral solution	0.31	0.22	-0.290323
	Electronic catalog	B01AB05 Enoxaparin 80 mg parenteral solution	0	6.4	--
		H02AB04 Methylprednisolone 500 mg parenteral solid	10.8	10.8	--
		J01GB06 Amikacin 250 mg/mL parenteral solution	0.36	0.36	--
		J01CR01 Ampicillin 100 mg + beta-lactamase inhibitor 500 mg parenteral solid	0.44	0.44	--
		J01DH02 Meropenem 500 mg parenteral solid	1.4	1.4	--
		J01XA01 Vancomycin 500 mg parenteral solid	1.3	1.3	--
		N01AX10 Propofol 20 mg/mL parenteral solution	4	4	--
		N02AA01 Morphine 20 mg/mL parenteral solution	0.78	0.78	--
		N05AH04 Quetiapine 25 mg oral solid	0.036709	0.03671	--
		N05AX08 Risperidone 1 mg/mL oral solution	5.699	5.699	--
		P01BA01 Chloroquine 250 mg oral solid	0.042	0.042	--
		R03AC02 Salbutamol 0.1 mg inhalation solution	1.05	1.05	--
		V03AB23 Acetylcysteine 100 mg/mL parenteral solution	0.75	0.75	--
	Reverse auction	J01FA09 Clarithromycin 500 mg parenteral solid	11	11	--
		J01XB01 Colistin 100 mg parenteral solid	7.7	7.5	-0.025974
