# Supplementary material for: Drug shortages in a state-owned academic hospital during the COVID-19 pandemic in Ecuador
Source: Research Square preprint supplement (doi:10.21203/rs.3.rs-289532/v1), 2021-03-02
Supplement: Supplementary file 2 [file 83dd411ac2c9e6b1679a27fe.xlsx]

## Sheet: table_1_final
	Table 1. Medicines shortages during the COVID-19 sanitary emergency between march and july 2020, and procurement processes to overcome the shortage.
	ATC group	ATC code medicine and formulation	Quantity below critical stock	Number of times medicine stock run out	Type of procurement process used to overcome shortage
					Purchase	Loan stock	Donations
	B01 antithrombotic agents	B01AB05 Enoxaparin 40 mg parenteral solution	Yes	5	●	●
		B01AB05 Enoxaparin 60 mg parenteral solution	Yes	5	●	●
		B01AB05 Enoxaparin 80 mg parenteral solution	Yes	1	●
		B01AB01 Nonfractionated heparin 5000 UI/mL parenteral solution	Yes	3	●	●
	C01 cardiac therapy	C01CA24 Epinephrine 1 mg/mL parenteral solution	Yes	1	●		●
		C01CA03 Norepinephrine 1 mg/mL parenteral solution	Yes	9	●
	C03 diuretics	C03CA01 Furosemide 10 mg/mL parenteral solution	Yes	4		●
	H02 corticosteroids for systemic use	H02AB02 Dexamethasone 4 mg/mL parenteral solution	Yes	--		●
		H02AB04 Methylprednisolone 125 mg parenteral solid	Yes	3	●	●
		H02AB04 Methylprednisolone 500 mg parenteral solid	Yes	2		●
	J01 antibacterials for systemic use	J01GB06 Amikacin 250 mg/mL parenteral solution	No	--
		J01CR01 Ampicillin 100 mg + beta-lactamase inhibitor 500 mg parenteral solid	No	--
		J01FA10 Azithromycin 500 mg oral solid	Yes	--	●	●
		J01FA09 Clarithromycin 500 mg oral solid	Yes	1		●
		J01FA09 Clarithromycin 500 mg parenteral solid	No	--
		J01XB01 Colistin 100 mg parenteral solid	Yes	4	●
		J01DH02 Meropenem 1000 mg parenteral solid	Yes	1			●
		J01DH02 Meropenem 500 mg parenteral solid	Yes	--	●
		J01CR05 Piperacillin 4 g + beta-lactamase inhibitor 0.5 g parenteral solid	Yes	2			●
		J01XA01 Vancomycin 1000 mg parenteral solid	Yes	1
		J01XA01 Vancomycin 500 mg parenteral solid	Yes	2	●	●
	M03 muscle relaxants	M03AC09 Rocuronium bromide 100 mg/mL parenteral solution	Yes	6	●	●
	N01 anesthetics	N01AX10 Propofol 10 mg/mL parenteral solution	Yes	--		●
		N01AX10 Propofol 20 mg/mL parenteral solution	Yes	1	●	●
	N02 analgesics	N02AB03 Fentanyl 0.05 mg/mL parenteral solution	Yes	8	●	●
		N02AA01 Morphine 10 mg/mL parenteral solution	Yes	2		●
		N02AA01 Morphine 20 mg/mL parenteral solution	Yes	3	●	●
		N02BE01 Paracetamol 10 mg/mL parenteral solution	Yes	--	●
	N05 psycholeptics	N05AD01 Haloperidol 5 mg/mL parenteral solution	Yes	4	●	●
		N05CD08 Midazolam 15 mg / 3 mL parenteral solution	Yes	3		●
		N05CD08 Midazolam 5 mg/mL parenteral solution	Yes	9	●	●
		N05AH04 Quetiapine 100 mg oral solid	Yes	2		●
		N05AH04 Quetiapine 25 mg oral solid	Yes	--	●	●
		N05AX08 Risperidone 1 mg/mL oral solution	No	--
	P01 antiprotozoals	P01BA01 Chloroquine 250 mg oral solid	Yes	--		●
	R03 drugs for obstructive airway diseases	R03BB01 Ipratropium bromide 0.02 mg inhalation solution	Yes	4	●	●
		R03AC02 Salbutamol 0.1 mg inhalation solution	No	--
	V03 other therapeutic products	V03AB23 Acetylcysteine 100 mg/mL parenteral solution	No	--
